# Supplementary material for: Polyester biodegradability: importance and potential for optimisation
Source: Royal Society of Chemistry journal article supplement (doi:10.1039/d3gc04489k), 2024-01-01
Supplement: d3gc04489k1.pdf [file d3gc04489k1.pdf]

## Supporting Information

# Polyester biodegradability: importance and potential for optimization

Yue Wang,<sup>a, b</sup> Robert-Jan van Putten,<sup>c</sup> Albert Tietema,<sup>b</sup> John R. Parsons<sup>b</sup> and Gert-Jan M. Gruter<sup>\*a, c</sup>

<sup>a</sup> van 't Hoff Institute for Molecular Sciences (HIMS), University of Amsterdam, Science Park 904, 1098 XH Amsterdam, the Netherlands.

<sup>b</sup> Institute for Biodiversity and Ecosystem Dynamics (IBED), University of Amsterdam, Science Park 904, 1098 XH Amsterdam, the Netherlands.

<sup>c</sup> Avantium Support BV, Zekeringstraat 29, 1014 BV Amsterdam, the Netherlands; [robert-jan.vanputten@avantium.com](mailto:robert-jan.vanputten@avantium.com)

\* Correspondence: [g.j.m.gruter@uva.nl](mailto:g.j.m.gruter@uva.nl).

Table S 1 Overview of polyesters discussed and their potential recyclability. n.a. = not applicable (not biodegradable); n.i.a. = no information available.

| Section         | Polyester | Molecular structures                                                          | Biodegradation methods – <u>Parameters</u>                                                              | Biodegraded products | Reference                                   | Potential recyclability <sup>a</sup>                                                                        |
|-----------------|-----------|-------------------------------------------------------------------------------|---------------------------------------------------------------------------------------------------------|----------------------|---------------------------------------------|-------------------------------------------------------------------------------------------------------------|
| Aromatic diacid | PET       |                                                                               | Composting (58 °C, 270 d) – <u>CO<sub>2</sub></u>                                                       | n.a.                 | Fig.8 <sup>85</sup>                         | - Mechanical (most commonly), chemical, biological <sup>24,77,78,107</sup>                                  |
|                 | PEF       |                                                                               | Composting (58 °C, 450 d) – <u>CO<sub>2</sub></u>                                                       | CO <sub>2</sub> ,    | Fig.8 <sup>85</sup>                         | - Mechanical (compatible with current PET recycling systems), chemical, biological <sup>78,85,107,108</sup> |
|                 | PBAT      |                                                                               | Composting (50 °C) – <u>Mass loss</u> ;<br>Enzymatic hydrolysis (37-55 °C, 1 – 18 d) – <u>Titration</u> | n.i.a.               | Fig.5 & Fig.6 <sup>62</sup>                 | - Mechanical (for PLA/PBAT <sup>76</sup> ), chemical <sup>109</sup> , biological <sup>79</sup>              |
|                 |           |                                                                               | Enzymatic hydrolysis (30 °C, 20 h) – <u>Mass loss</u>                                                   | n.i.a.               | Fig.7 <sup>65</sup>                         |                                                                                                             |
| PBFGA           |           | Non-enzymatic (35 d) & enzymatic hydrolysis (70 d) (37 °C) – <u>Mass loss</u> | n.i.a.                                                                                                  | Fig.9 <sup>86</sup>  | - n.i.a.<br>- *PBF: chemical <sup>110</sup> |                                                                                                             |

|                                                                 |                                     |                                                                                                                                                                  |                                                                                                                                                                                     |                                                                                          |                               |                                                                                                                                                                                                 |
|-----------------------------------------------------------------|-------------------------------------|------------------------------------------------------------------------------------------------------------------------------------------------------------------|-------------------------------------------------------------------------------------------------------------------------------------------------------------------------------------|------------------------------------------------------------------------------------------|-------------------------------|-------------------------------------------------------------------------------------------------------------------------------------------------------------------------------------------------|
|                                                                 | <p>PBIS<br/>(PIS/PBS/<br/>PBSA)</p> | 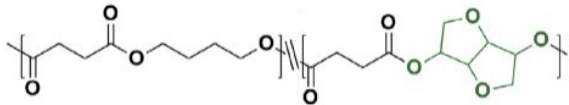 <p>PBIS copolyester</p>                                                        | <p>Non-enzymatic &amp; enzymatic hydrolysis (37 °C, 16 w) - <u>Mass loss</u></p>                                                                                                    | <p>n.i.a.</p>                                                                            | <p>Fig.10<sup>87</sup></p>    | <ul style="list-style-type: none"> <li>- n.i.a.</li> <li>- *PBS<sup>76</sup>: biological<sup>111,112</sup></li> <li>- *PLA/PBS: mechanical, chemical and biological<sup>76,113</sup></li> </ul> |
| <p>Cyclic aliphatic diol<br/>/<br/>linear aliphatic monomer</p> | <p>PISOX</p>                        |  <p>R listed below</p> <p>OX was replaced by TPA in one of the composition</p> | <p>Biodegradation in soil (25 °C, 270 d), seawater and sediment (25 °C, 53 d) – <u>CO<sub>2</sub></u>;</p> <p>Non-enzymatic hydrolysis (25 °C, 185 d) – <u>Soluble monomers</u></p> | <p>CO<sub>2</sub>;<br/>monomers including oxalic acid, isosorbide and other co-diols</p> | <p>Fig.11<sup>89,90</sup></p> | <ul style="list-style-type: none"> <li>- n.i.a.</li> </ul>                                                                                                                                      |

|                          |      |                                                                                                                                                                                                                                                    |                                                                                                                                         |                             |                      |                                                                   |
|--------------------------|------|----------------------------------------------------------------------------------------------------------------------------------------------------------------------------------------------------------------------------------------------------|-----------------------------------------------------------------------------------------------------------------------------------------|-----------------------------|----------------------|-------------------------------------------------------------------|
| Linear aliphatic monomer | PBAD | $\left[ \text{O} - \overbrace{(\text{CH}_2)_4}^{\text{BD unit}} - \text{O} - \overset{\text{O}}{\parallel} \text{C} - \overbrace{(\text{CH}_2)_n}^{\text{DCA unit}} - \overset{\text{O}}{\parallel} \text{C} \right]_m$ <p>n = 2-10; n = 10-14</p> | Biodegradation in an aqueous medium (supernatant of soil suspension as inoculum, 25 °C, 30 d) – $\underline{\text{O}_2}$                | CO <sub>2</sub>             | Fig.12 <sup>90</sup> | - n.i.a                                                           |
|                          |      | Biodegradation in an aqueous medium (supernatant of soil suspension and PBAD degrading isolates as inoculum, 25 °C, 30 d) – $\underline{\text{O}_2}$                                                                                               | n.a.                                                                                                                                    | Fig.13 <sup>91,92</sup>     |                      |                                                                   |
| Branched monomer         | PLGA | 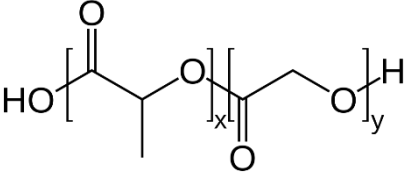 <p>x= LA, y = GA</p>                                                                                                                                            | Non-enzymatic hydrolysis (37 °C, 7 w) – <u>Mass loss, intrinsic viscosity</u>                                                           | n.i.a.                      | Fig.16 <sup>98</sup> | - *PLA: mechanical, chemical, biological <sup>76,77,107,114</sup> |
|                          |      |                                                                                                                                                                                                                                                    | Biodegradation in soil (25 °C, 53 d) – $\underline{\text{CO}_2}$ ;<br>Non-enzymatic hydrolysis (25 °C, 116 w) – <u>Soluble monomers</u> | CO <sub>2</sub> ;<br>GA, LA | Fig.17 <sup>60</sup> |                                                                   |

|             |                                                                                                                                              |                                                              |                                                                             |                             |                                                                                                                                          |
|-------------|----------------------------------------------------------------------------------------------------------------------------------------------|--------------------------------------------------------------|-----------------------------------------------------------------------------|-----------------------------|------------------------------------------------------------------------------------------------------------------------------------------|
| <p>PHAs</p> | <p><math>m = \text{HB}; n = \text{HV}; n</math> is replaced by <math>\text{HHx}</math> and <math>\text{HO}</math> for other copolyesters</p> | <p>Enzymatic hydrolysis (37 °C, 25 h) – <u>Mass loss</u></p> | <p>HB monomer, dimers HB–HB, HV–HB, HV–HV, HB–HHx and HB–HB–HHx trimers</p> | <p>Fig.18<sup>100</sup></p> | <ul style="list-style-type: none"> <li>- Biological<sup>76,77,79,115</sup></li> <li>- * PLA/PHAs: mechanical<sup>76,116</sup></li> </ul> |
|-------------|----------------------------------------------------------------------------------------------------------------------------------------------|--------------------------------------------------------------|-----------------------------------------------------------------------------|-----------------------------|------------------------------------------------------------------------------------------------------------------------------------------|

- a. Chemical recycling specifically refers to depolymerization into monomers and or low molecular weight polymers, enabling subsequent polymerization; pyrolysis is not covered in this context.

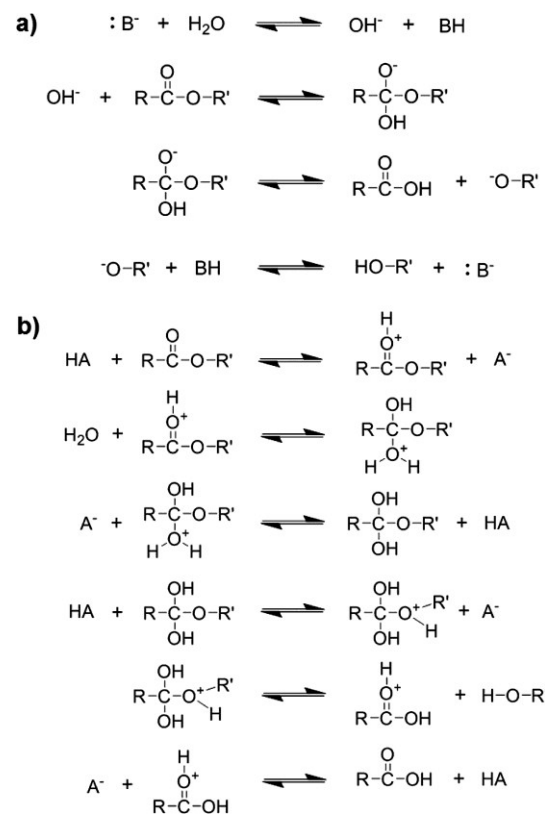

Figure S 1 Mechanism for (a) base-catalysed and (b) acid-catalysed hydrolysis of polyesters. Reprinted with permission from<sup>64</sup>. Copyright © 2018 American Chemical Society.
